# Supplementary material for: Global streamflow and flood response to stratospheric aerosol geoengineering
Source: Copernicus journal article supplement (doi:10.5194/acp-2018-338), 2018-04-18
Supplement: Supplementary file 1 [file acp-2018-338-supplement.pdf]

Supporting Information for

**Global streamflow and flood response to stratospheric aerosol geoengineering**

Liren Wei<sup>1</sup>, Duoying Ji<sup>1</sup>, Chiyuan Miao<sup>2</sup>, John C. Moore<sup>1,3,4</sup>

<sup>1</sup>College of Global Change and Earth System Science, Beijing Normal University, Beijing 100875, China

<sup>2</sup>State Key Laboratory of Earth Surface Processes and Resource Ecology, Faculty of Geographical Science, Beijing Normal University, Beijing 100875, China

<sup>3</sup>Arctic Centre, University of Lapland, P.O. Box 122, 96101 Rovaniemi, Finland

<sup>4</sup>CAS Center for Excellence in Tibetan Plateau Earth Sciences, Beijing 100101, China

**BNU-ESM**

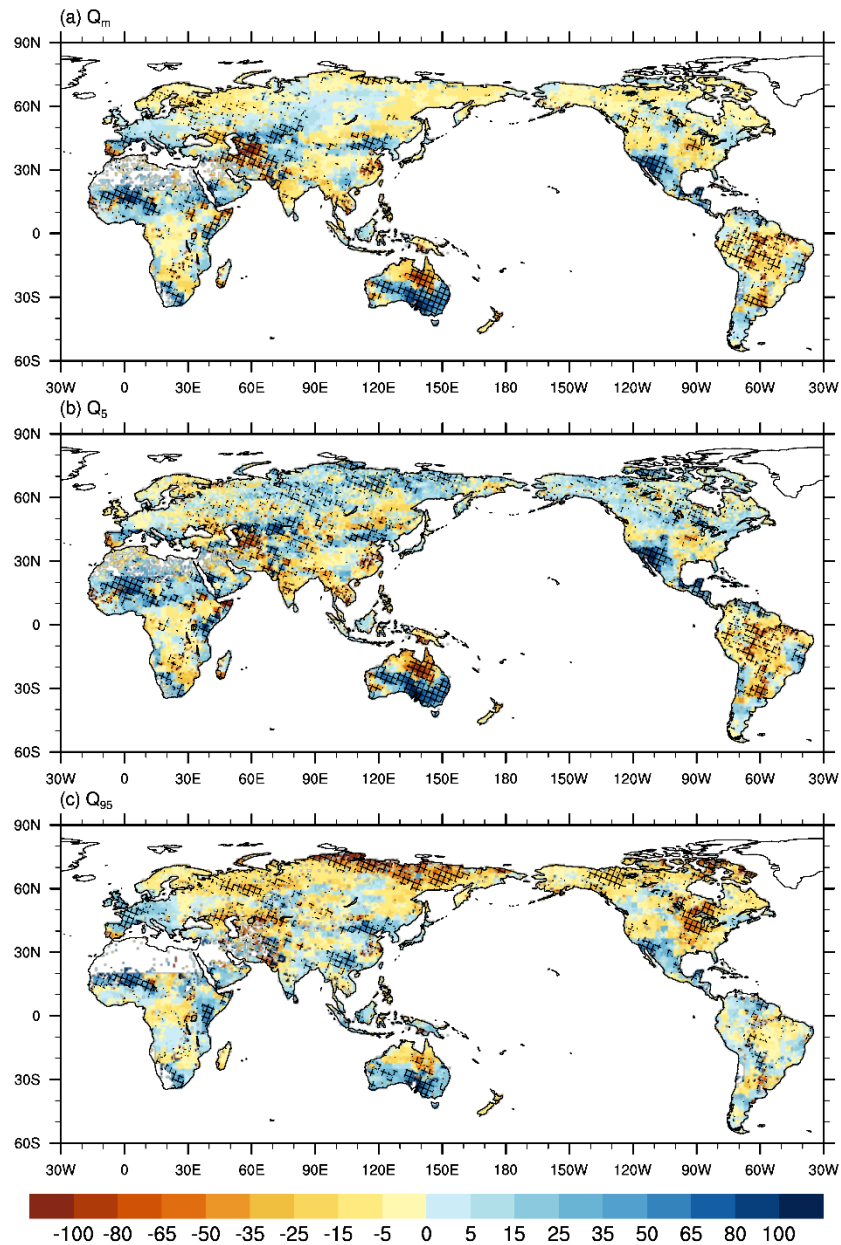

Figure S1: Relative difference of three river streamflow indicators between G4 (2030-2069) and RCP4.5 (2030-2069), as percentages of the mean of G4 and RCP4.5:  $100\% \times 2(G4 - RCP4.5) / (G4 + RCP4.5)$ , projected by BNU-ESM. From Top, to bottom represents long-term mean flow ( $Q_m$ ); Middle, high flow ( $Q_5$ ); and Bottom, low flow ( $Q_{95}$ ). Grid cells with river discharge less than 0.01 mm/day are masked. Hashed areas indicate locations where the streamflow changes are significant at the 95% level.

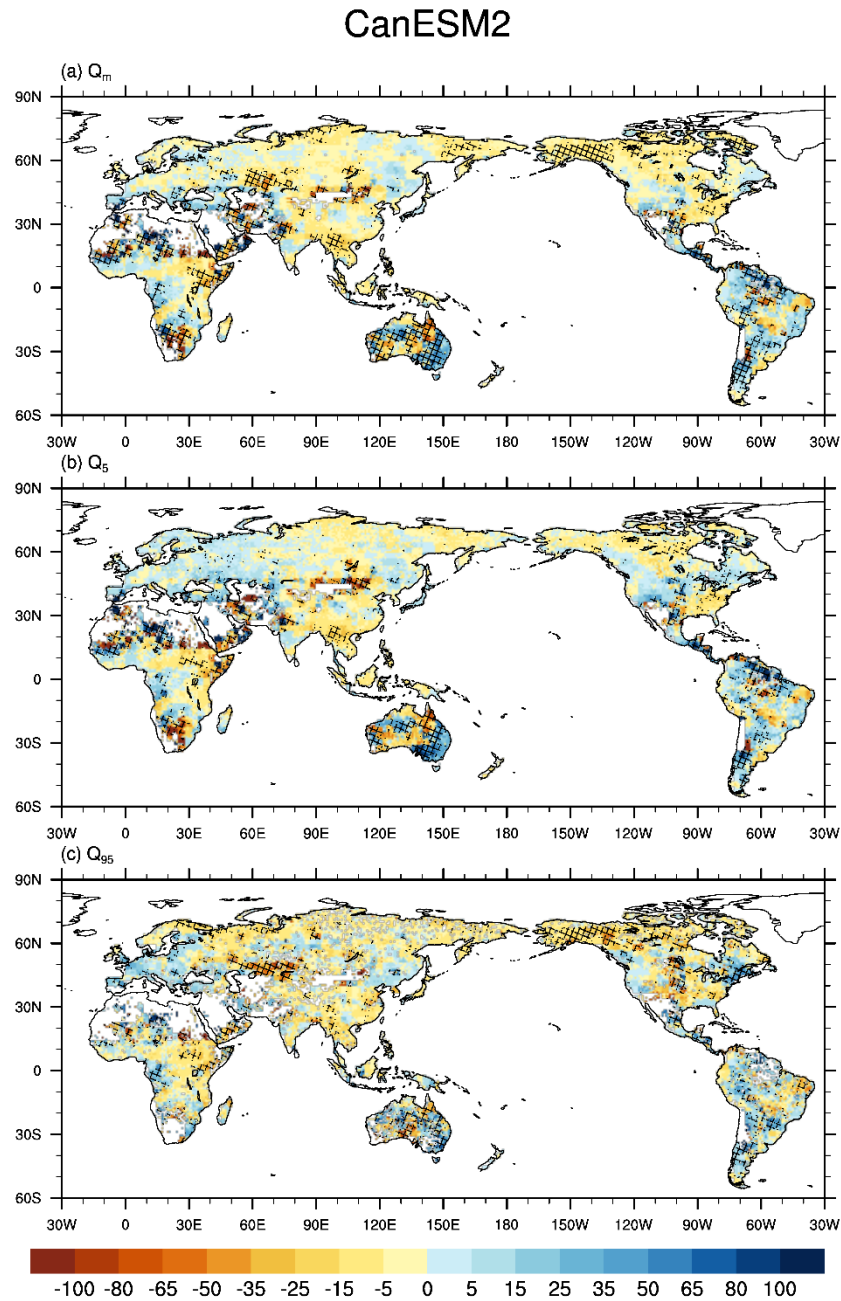

Figure S2: As for Figure S1 but for CanESM2

# GEOSCCM

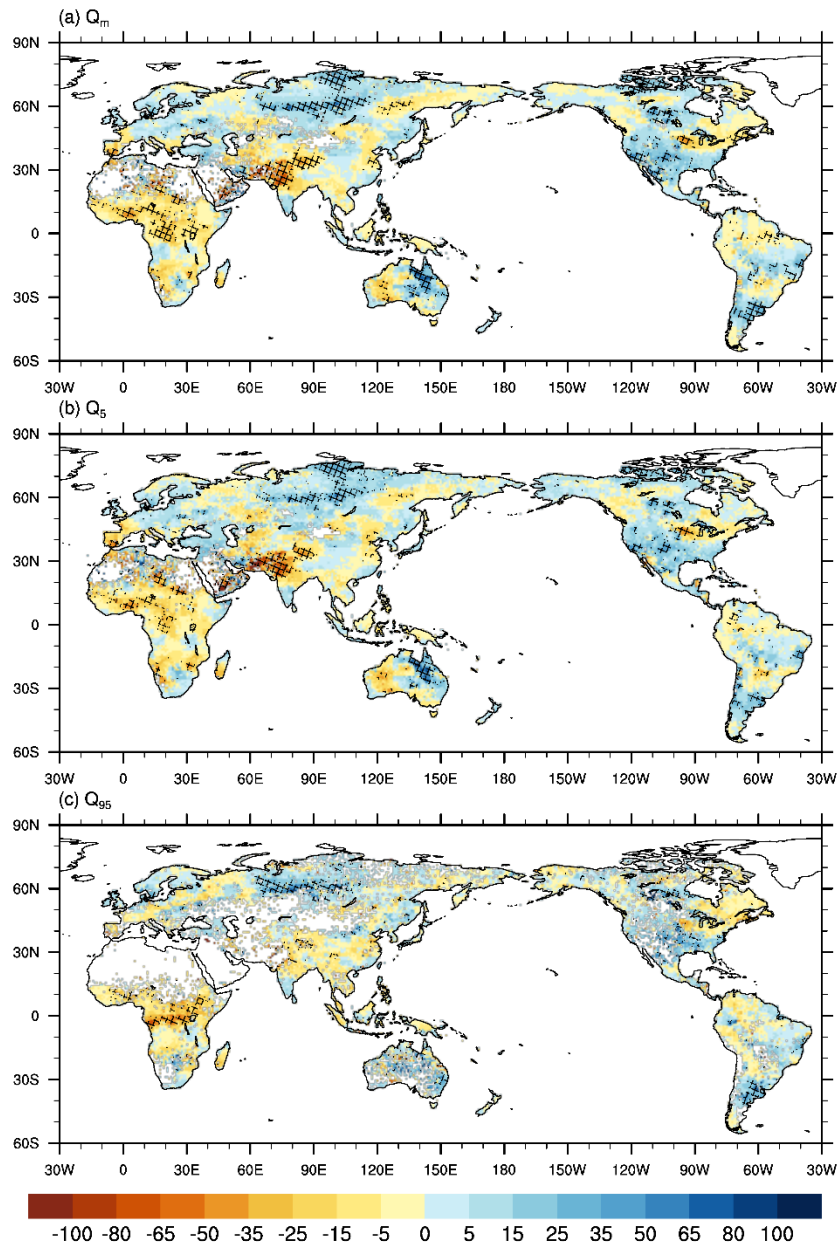

Figure S3: As for Figure S1 but for GEOSCCM.

# MIROC-ESM

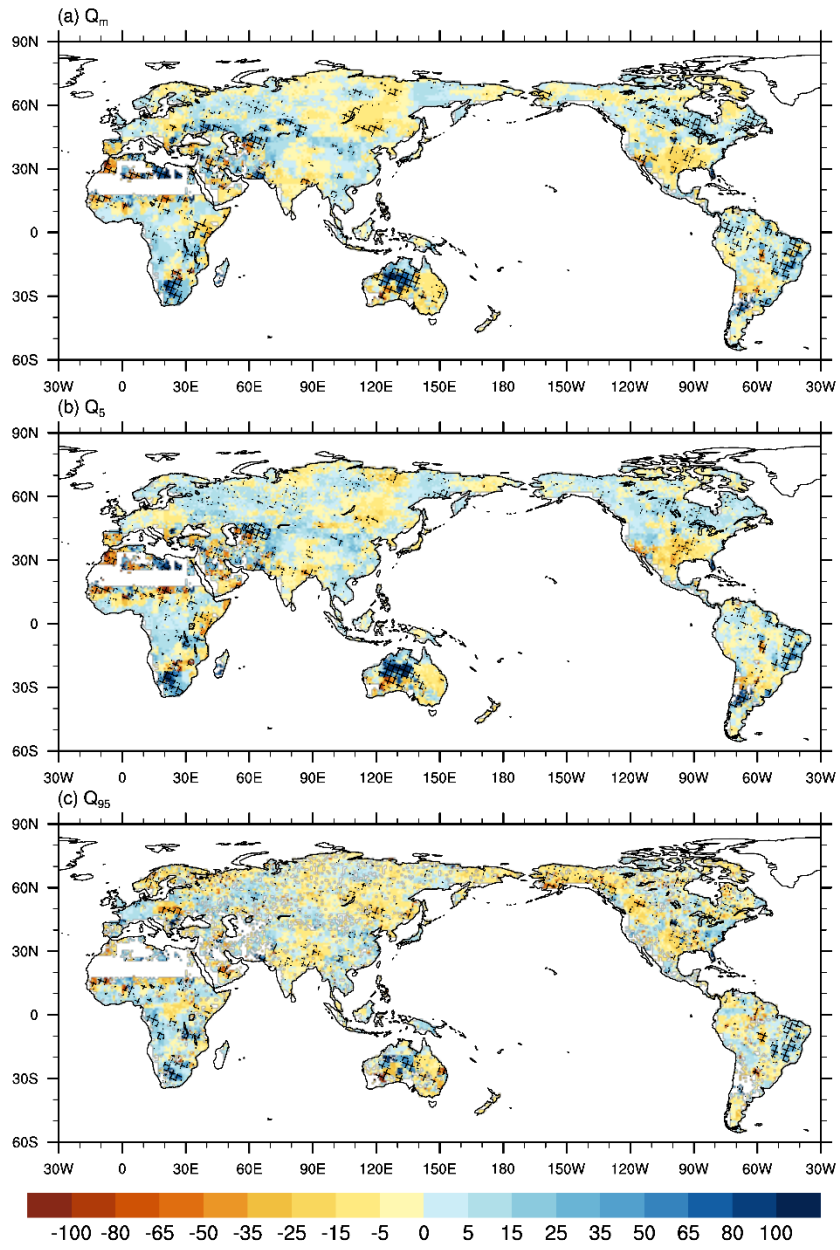

Figure S4: As for Figure S1 but for MIROC-ESM.

# MIROC-ESM-CHEM

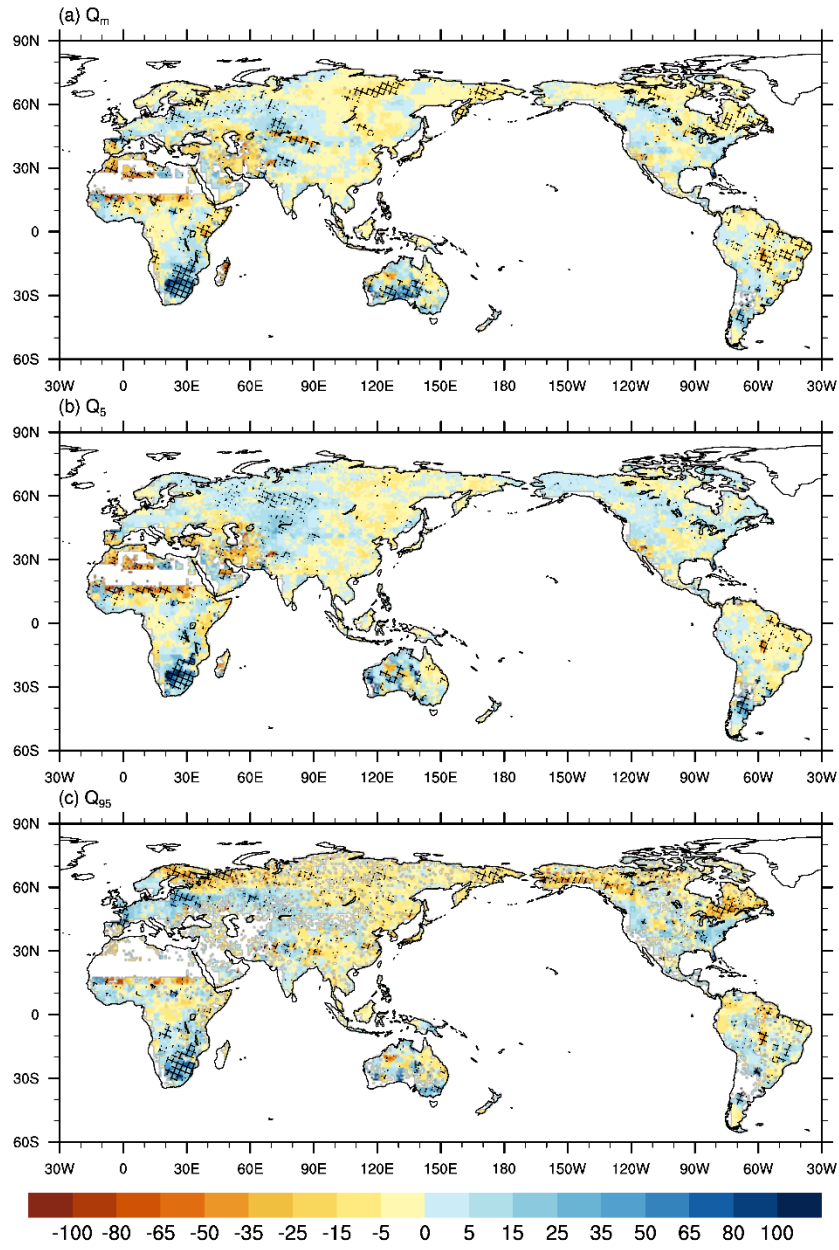

Figure S5: As for Figure S1 but for MIROC-ESM-CHEM.

# NorESM1-E

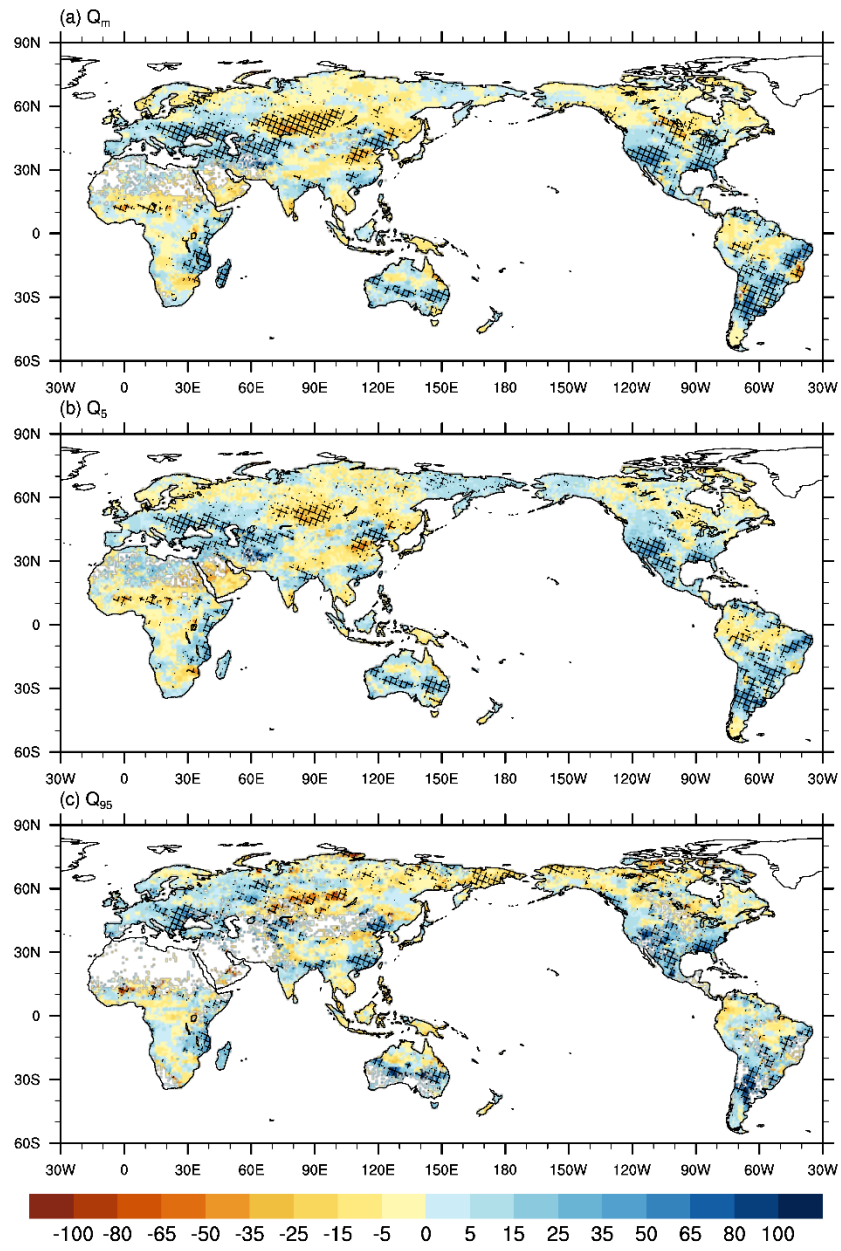

Figure S6: As for Figure S1 but for NorESM1-E.

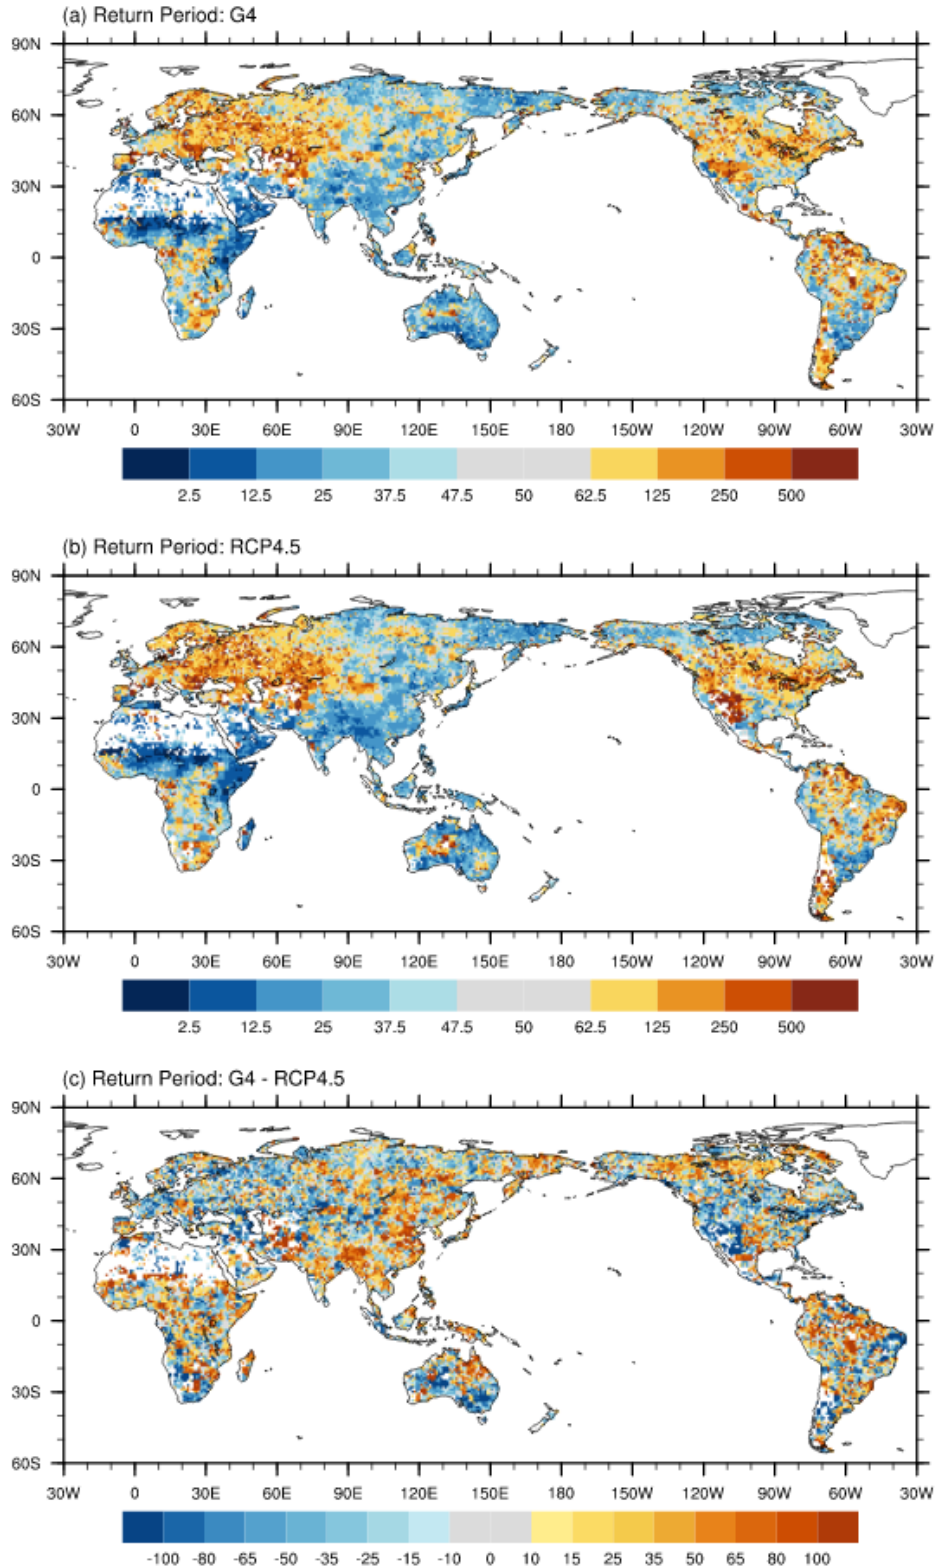

Figure S7: Multi-model ensemble median of return periods for discharge which correspond to 50-year return period in the historical simulation (1960-1999) under (a) G4, (b) RCP4.5 scenarios and (c) the relative difference of G4 and RCP4.5, as percentages of mean of return periods:  $100\% \times 2(G4 - RCP4.5) / (G4 + RCP4.5)$ . i.e. mean annual discharge for historical period less than 0.01 mm/day were masked out.

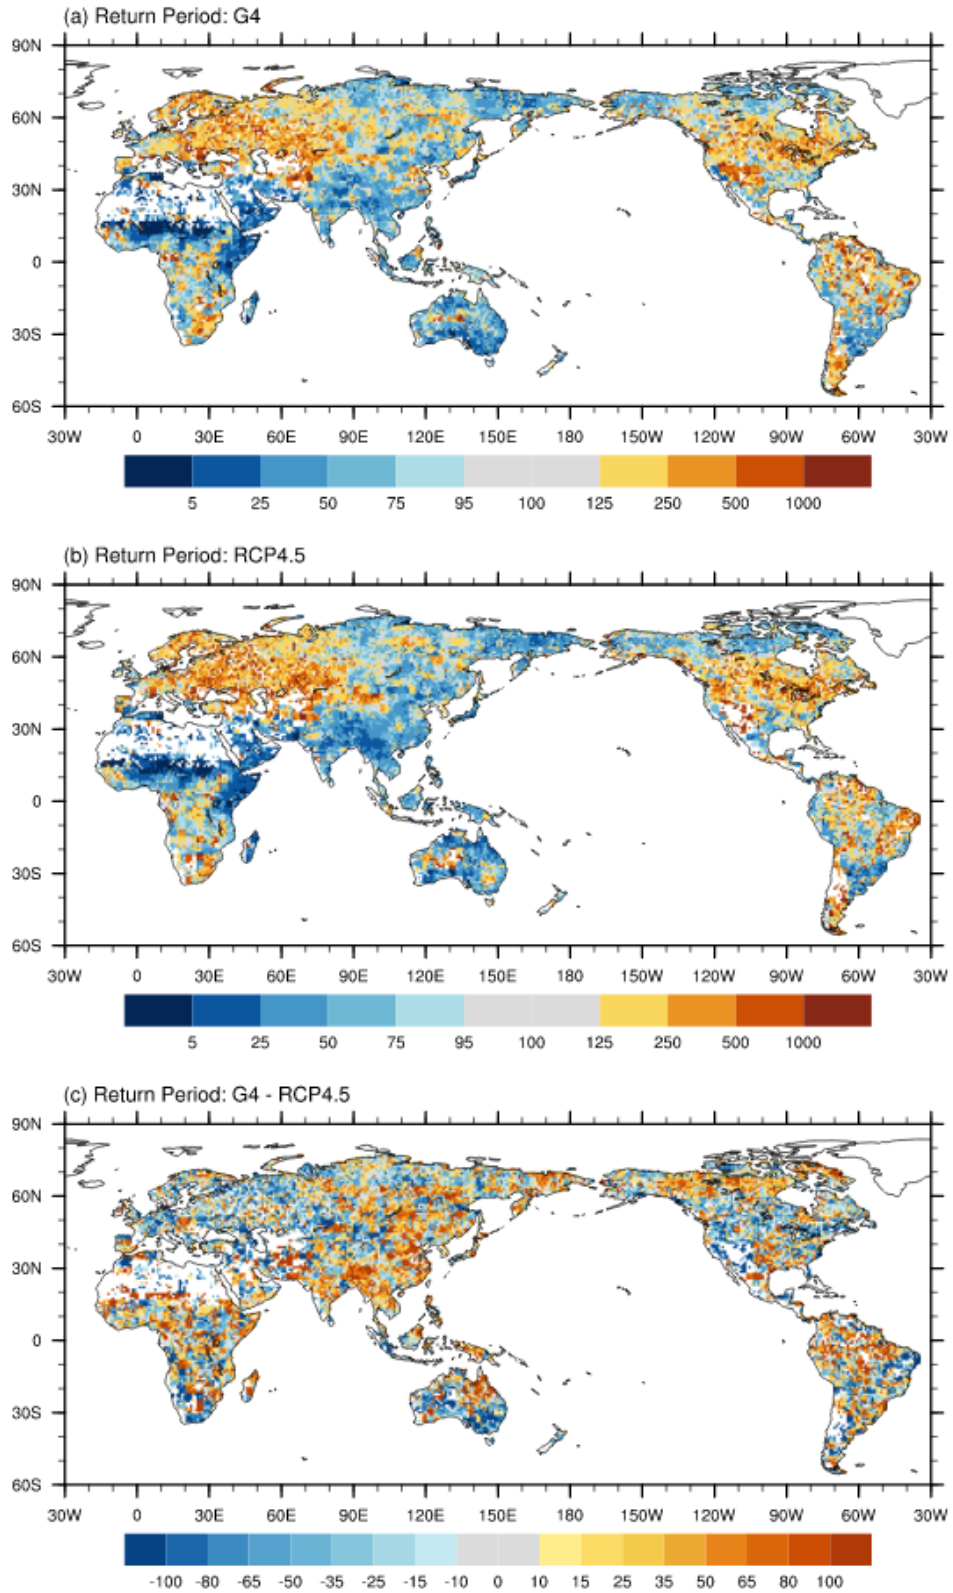

Figure S8: As for Figure S7 but for 100-year return periods.
